# Supplementary material for: FHG-PR: a hybridized fuzzy-AHP and game theory model for assessing privacy risk on social media platforms
Source: Frontiers journal article supplement (doi:10.3389/fcomp.2024.1389223), 2024-11-11
Supplement: Data_Sheet_1.PDF [file Data_Sheet_1.PDF]

## A privacy risk assessment survey for Meta and X platform (Formerly known as Twitter)

Feb 20, 2024

Please Kindly fill in the following demographic information. Note that your name will not be published in any venue to protect your privacy

\* Required

### Demographic Information

1. Name (Optional)

## 2. Gender

- ☐ Male
- ☐ female
- ☐ Prefer not to say

## 3. Job Title \*

- ☐ Programmer
  - ☐ Cybersecurity Expert
  - ☐ IT proffessional
  - ☐ Other
- 

## 4. Do you have an X account? \*

- ☐ Yes
- ☐ No

## 5. Do you have an account with Meta (Facebook, Instagram, Threads etc.)? \*

- ☐ Yes
- ☐ No

6. How often do you use the X social media platform? \*

- ☐ Daily
- ☐ Weekly
- ☐ Monthly
- ☐ Seasonal
- ☐ Yearly
- ☐ Never

7. How often do you use the Meta Platform (Facebook, Instagram, snapchat etc.)? \*

- ☐ Daily
- ☐ Weekly
- ☐ Monthly
- ☐ Seasonal
- ☐ Yearly
- ☐ Never

8. How would you rate your experience with Meta social media platforms as user? \*

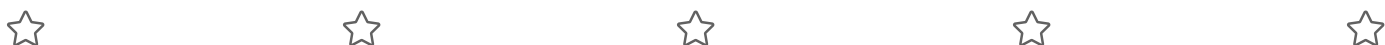

9. How would you rate your experience with X as user? \*

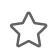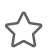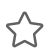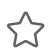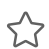

# CRITERIA AND SUB-CRITERIA RANKING FOR X PLATFORM

Due to the several changes that X (Formerly know as Twitter) has experienced in recent months, Kindly rank how influential the following **4 criteria (with 3 sub-criteria for each)** are. Your rating will help in determining the privacy risk assessment of X.

10. How would you rank the influence of the following four criteria (C1 - C4) on the privacy invasion risk of user's data in X social media platform? \*

|                                                                                                                         | Extremely Influential | Very Influential      | Essentially Influential | Moderate Influential  | Slightly Influential  |
|-------------------------------------------------------------------------------------------------------------------------|-----------------------|-----------------------|-------------------------|-----------------------|-----------------------|
| C1) X's transparency on data security, privacy policy and Ad targeting                                                  | <input type="radio"/> | <input type="radio"/> | <input type="radio"/>   | <input type="radio"/> | <input type="radio"/> |
| C2) Users control over the spread and use of their data                                                                 | <input type="radio"/> | <input type="radio"/> | <input type="radio"/>   | <input type="radio"/> | <input type="radio"/> |
| C3) X companies' compliance to privacy policies and data sharing.                                                       | <input type="radio"/> | <input type="radio"/> | <input type="radio"/>   | <input type="radio"/> | <input type="radio"/> |
| C4) Third-party developers & Advertisers Considerations for terms and condition for accessing users' data on X platform | <input type="radio"/> | <input type="radio"/> | <input type="radio"/>   | <input type="radio"/> | <input type="radio"/> |

11. How would you rank the influence and dependency of (C1 "***X's transparency on data security, privacy policy and Ad targeting***") with its following sub-criteria (SC1 - SC3) that may influence the privacy invasion of user's data in the X platform? \*

|                                                                               | Extremely Influential | Very Influential      | Essentially Influential | Moderate Influential  | Slightly Influential  |
|-------------------------------------------------------------------------------|-----------------------|-----------------------|-------------------------|-----------------------|-----------------------|
| SC1)X's measures against data breach and incident response protocol they use  | <input type="radio"/> | <input type="radio"/> | <input type="radio"/>   | <input type="radio"/> | <input type="radio"/> |
| SC2)X's transparency in data practice and privacy update frequency            | <input type="radio"/> | <input type="radio"/> | <input type="radio"/>   | <input type="radio"/> | <input type="radio"/> |
| SC3) X's extent to which user data is being used for personalized advertising | <input type="radio"/> | <input type="radio"/> | <input type="radio"/>   | <input type="radio"/> | <input type="radio"/> |

12. How would you rank the influence and dependency of (c2 "**Users control over the spread and use of their data**") with its following sub-criteria (SC4- SC6) that may influence the privacy invasion of user's data in the X platform? \*

|                                                                                        | Extremely Influential | Very Influential      | Essentially Influential | Moderate Influential  | Slightly Influential  |
|----------------------------------------------------------------------------------------|-----------------------|-----------------------|-------------------------|-----------------------|-----------------------|
| SC4) Users' knowledge over their account security features and encryption protocols    | <input type="radio"/> | <input type="radio"/> | <input type="radio"/>   | <input type="radio"/> | <input type="radio"/> |
| SC5) Users' knowledge over data sharing & visibility and clear consent mechanism       | <input type="radio"/> | <input type="radio"/> | <input type="radio"/>   | <input type="radio"/> | <input type="radio"/> |
| SC6) User's willingness to report privacy invasion and its consequences on their life. | <input type="radio"/> | <input type="radio"/> | <input type="radio"/>   | <input type="radio"/> | <input type="radio"/> |

13. How would you rank the influence and dependency of **(C3 "X companies' compliance to privacy policies and data sharing")** with its following sub-criteria (SC7 - SC9) that may influence the privacy invasion of user's data in the X platform? \*

|                                                                                                          | Extremely Influential | Very Influential      | Essentially Influential | Moderate Influential  | Slightly Influential  |
|----------------------------------------------------------------------------------------------------------|-----------------------|-----------------------|-------------------------|-----------------------|-----------------------|
| SC7) Regulatory bodies' concern regarding ensuring adequate security measures to protect user data       | <input type="radio"/> | <input type="radio"/> | <input type="radio"/>   | <input type="radio"/> | <input type="radio"/> |
| SC8) Regulatory bodies' practice in privacy transparency requirement considering International laws      | <input type="radio"/> | <input type="radio"/> | <input type="radio"/>   | <input type="radio"/> | <input type="radio"/> |
| SC9) Regulatory bodies' knowledge regarding user's privacy invasion report authentication on X platform. | <input type="radio"/> | <input type="radio"/> | <input type="radio"/>   | <input type="radio"/> | <input type="radio"/> |



14. How would you rank the influence and dependency of (C4 "***Third-party developers & Advertisers Considerations for terms and condition for accessing users' data on X platform***" with its following sub-criteria (SC10-12) that may influence the privacy invasion of user's data in the X platform? \*

|                                                                                                                                       | Extremely Influential | Very Influential      | Essentially Influential | Moderate Influential  | Slightly Influential  |
|---------------------------------------------------------------------------------------------------------------------------------------|-----------------------|-----------------------|-------------------------|-----------------------|-----------------------|
| SC10) Third-party developers' knowledge on the scope of user data access through X's platform Application programming interface (API) | <input type="radio"/> | <input type="radio"/> | <input type="radio"/>   | <input type="radio"/> | <input type="radio"/> |
| SC11) Advertisers' awareness on the availability of user's data for marketing and business purposes                                   | <input type="radio"/> | <input type="radio"/> | <input type="radio"/>   | <input type="radio"/> | <input type="radio"/> |
| SC12) Compliance with the X platform policies and data usage disclosures                                                              | <input type="radio"/> | <input type="radio"/> | <input type="radio"/>   | <input type="radio"/> | <input type="radio"/> |

# CRITERIA AND SUB-CRITERIA RANKING FOR META PLATFORM

With the development of additional social media apps brought forth by Meta (Facebook, Instagram, Threads etc.) in recent months, Kindly rate how influential the following **4 criteria (with 3 sub-criteria for each)** are. Your rating will help in determining the privacy risk assessment of Meta

15. How would you rank the influence of the following four criteria (C1 - C4) on the privacy invasion risk of user's data in Meta social media platform? \*

|                                                                                                                   | Extremely Influential | Very Influential      | Essentially Influential | Moderate Influential  | Slightly Influential  |
|-------------------------------------------------------------------------------------------------------------------|-----------------------|-----------------------|-------------------------|-----------------------|-----------------------|
| C1) Meta's transparency on data security, privacy policy and Ad targeting                                         | <input type="radio"/> | <input type="radio"/> | <input type="radio"/>   | <input type="radio"/> | <input type="radio"/> |
| C2) Users control over the spread and use of their data                                                           | <input type="radio"/> | <input type="radio"/> | <input type="radio"/>   | <input type="radio"/> | <input type="radio"/> |
| C3) Meta's compliance to privacy policies and data sharing                                                        | <input type="radio"/> | <input type="radio"/> | <input type="radio"/>   | <input type="radio"/> | <input type="radio"/> |
| C4) Third-party developers & Advertisers Considerations for terms and condition for accessing users' data on Meta | <input type="radio"/> | <input type="radio"/> | <input type="radio"/>   | <input type="radio"/> | <input type="radio"/> |

16. How would you rank the influence and dependency of (C1 "**Meta's transparency on data security, privacy policy and Ad targeting**") with its following sub-criteria (SC1 - SC3) that may influence the privacy invasion of user's data in the X platform? \*

|                                                                                  | Extremely Influential | Very Influential      | Essentially Influential | Moderate Influential  | Slightly Influential  |
|----------------------------------------------------------------------------------|-----------------------|-----------------------|-------------------------|-----------------------|-----------------------|
| SC1) Meta's measures against data breach and incident response protocol they use | <input type="radio"/> | <input type="radio"/> | <input type="radio"/>   | <input type="radio"/> | <input type="radio"/> |
| SC2) Meta's transparency in data practice and privacy update frequency           | <input type="radio"/> | <input type="radio"/> | <input type="radio"/>   | <input type="radio"/> | <input type="radio"/> |
| SC3) Meta's extent to which user data is being used for personalized advertising | <input type="radio"/> | <input type="radio"/> | <input type="radio"/>   | <input type="radio"/> | <input type="radio"/> |

17. How would you rank the influence and dependency of (c2 "**Users control over the spread and use of their data**") with its following sub-criteria (SC4- SC6) that may influence the privacy invasion of user's data in the X platform? \*

|                                                                                        | Extremely Influential | Very Influential      | Essentially Influential | Moderate Influential  | Slightly Influential  |
|----------------------------------------------------------------------------------------|-----------------------|-----------------------|-------------------------|-----------------------|-----------------------|
| SC4) Users' knowledge over their account security features and encryption protocols    | <input type="radio"/> | <input type="radio"/> | <input type="radio"/>   | <input type="radio"/> | <input type="radio"/> |
| SC5) Users' knowledge over data sharing & visibility and clear consent mechanism       | <input type="radio"/> | <input type="radio"/> | <input type="radio"/>   | <input type="radio"/> | <input type="radio"/> |
| SC6) User's willingness to report privacy invasion and its consequences on their life. | <input type="radio"/> | <input type="radio"/> | <input type="radio"/>   | <input type="radio"/> | <input type="radio"/> |

18. How would you rank the influence and dependency of (C3 "**Meta's compliance to privacy policies and data sharing**") with its following sub-criteria (SC7 - SC9) that may influence the privacy invasion of user's data in the X platform? \*

|                                                                                                               | Extremely Influential | Very Influential      | Essentially Influential | Moderate Influential  | Slightly Influential  |
|---------------------------------------------------------------------------------------------------------------|-----------------------|-----------------------|-------------------------|-----------------------|-----------------------|
| SC7) Regulatory bodies' concern regarding ensuring adequate security measures to protect user data            | <input type="radio"/> | <input type="radio"/> | <input type="radio"/>   | <input type="radio"/> | <input type="radio"/> |
| SC8) Regulatory bodies' practice in privacy transparency requirement considering International laws           | <input type="radio"/> | <input type="radio"/> | <input type="radio"/>   | <input type="radio"/> | <input type="radio"/> |
| SC9) Regulatory bodies' knowledge regarding user's privacy invasion report authentication on Meta's platform. | <input type="radio"/> | <input type="radio"/> | <input type="radio"/>   | <input type="radio"/> | <input type="radio"/> |

19. How would you rank the influence and dependency of **(C4 "Third-party developers & Advertisers Considerations for terms and condition for accessing users' data on Meta")** with its following sub-criteria (SC10 - SC12) that may influence the privacy invasion of user's data in the X platform? \*

|                                                                                                     | Extremely Influential | Very Influential      | Essentially Influential | Moderate Influential  | Slightly Influential  |
|-----------------------------------------------------------------------------------------------------|-----------------------|-----------------------|-------------------------|-----------------------|-----------------------|
| SC10) Third-party developers' knowledge on the scope of user data access through Meta's API         | <input type="radio"/> | <input type="radio"/> | <input type="radio"/>   | <input type="radio"/> | <input type="radio"/> |
| SC11) Advertisers' awareness on the availability of user's data for marketing and business purposes | <input type="radio"/> | <input type="radio"/> | <input type="radio"/>   | <input type="radio"/> | <input type="radio"/> |
| SC12) Compliance with Meta's platform policies and data usage disclosures                           | <input type="radio"/> | <input type="radio"/> | <input type="radio"/>   | <input type="radio"/> | <input type="radio"/> |

This content is neither created nor endorsed by Microsoft. The data you submit will be sent to the form owner.
